# Supplementary material
Source: publisher figshare collection journal article supplement (https://karger.figshare.com/ndownloader/files/21385467)
Supplement: Supplementary file 1 [file 21385467]

This supplementary material consists of four parts. The first part includes chi-squared test results for goodness-of-fit, hypothesizing that the cell counts are equal in symptom presence between pre- and post-test conditions. The second part includes the R-codes used to draw a difference and a sum 2-D maps and then to estimate visually inspected associations with correlations to enhance interpretation. The R-codes also include the contingency table used for the present study and a researcher may replicate the 2-D maps and correlational results. The Third part is designed to explain how to identify sum and difference dimensions from the matched CA results; unlike other CA approaches, matched CA uniquely estimate sum and difference dimensions. The dimensional coordinates are summarized in Table 1. The fourth part includes the correlational results and each (row and column) category's contribution in a difference 2-D map; these results are summarized in Table 3.

### Part 1: Conduct Chi-Squared Tests for Goodness-Of-Fit for Pre- and Post-Treatment Conditions

As shown in Table 1, none of the chi-squared test results for the psychiatric symptom indicators was favorable for the post-treatment condition. These chi-squared test results were consistent with the matched CA results and 12 age groups were positively related with all psychiatric symptoms, except *De* (depression not otherwise specified). There were several significant results found among age groups (which were “red” highlighted); however, the cell counts in the post-treatment condition were larger than the cell counts in the pre-treatment condition, indicating that the psychiatric symptoms were even worsened after treatment. The frequencies in *De* were consistently smaller among age groups in post-treatment than in pre-treatment; this result was consistent with the *De* symptom location (opposite to all other symptom indicators) in Figure 1 (a difference 2-D map) included in the main text.

**TABLE 1**

*Chi-Squared Tests for Goodness-Of-Fit in Psychiatric Symptom Presence Indicators between Pre- and Post-Treatment Conditions*

|     | postMa     | preMa | p-value       | postDy     | preDy | p-value       | postDe | preDe | p-value | postPo     | prePo | p-value       |
|-----|------------|-------|---------------|------------|-------|---------------|--------|-------|---------|------------|-------|---------------|
| a1  | 19         | 19    | 1             | 3          | 1*    | 0.3173        | 20     | 25    | 0.4561  | 3          | 2*    | 0.6547        |
| a2  | 252        | 251   | 0.9644        | 23         | 24    | 0.8840        | 191    | 225   | 0.0955  | 51         | 42    | 0.3507        |
| a3  | 437        | 441   | 0.8926        | 29         | 25    | 0.5862        | 294    | 343   | 0.0522  | <b>125</b> | 92    | <b>0.0251</b> |
| a4  | 419        | 411   | 0.7813        | 108        | 101   | 0.6282        | 251    | 274   | 0.3155  | 110        | 91    | 0.1802        |
| a5  | 377        | 363   | 0.6068        | 79         | 71    | 0.5136        | 201    | 215   | 0.4925  | 117        | 98    | 0.195         |
| a6  | 233        | 228   | 0.8159        | 56         | 54    | 0.8488        | 125    | 139   | 0.3889  | 72         | 69    | 0.8005        |
| a7  | 141        | 141   | 1             | 32         | 33    | 0.9013        | 90     | 95    | 0.7132  | 65         | 54    | 0.3133        |
| a8  | 157        | 152   | 0.7761        | 27         | 23    | 0.5716        | 59     | 71    | 0.2926  | 60         | 48    | 0.2482        |
| a9  | 108        | 106   | 0.8913        | 18         | 21    | 0.631         | 60     | 67    | 0.5345  | 52         | 44    | 0.4142        |
| a10 | 308        | 298   | 0.6846        | 82         | 66    | 0.1884        | 139    | 169   | 0.0874  | 139        | 121   | 0.2643        |
| a11 | 152        | 145   | 0.6846        | 33         | 29    | 0.6115        | 59     | 71    | 0.2926  | 76         | 58    | 0.1200        |
| a12 | 36         | 35    | 0.9055        | 7          | 3     | 0.2059        | 10     | 11    | 0.8273  | 5          | 6     | 0.7630        |
|     | postOb     | preOb | p-value       | postGe     | preGe | p-value       | postAn | preAn | p-value | postSo     | preSo | p-value       |
| a1  | 14         | 9     | 0.2971        | 11         | 8     | 0.4913        | 10     | 15    | 0.3173  | 2          | 2*    | 1             |
| a2  | 98         | 74    | 0.06725       | 109        | 89    | 0.1552        | 232    | 213   | 0.3678  | <b>31</b>  | 14    | <b>0.0113</b> |
| a3  | <b>186</b> | 143   | <b>0.0178</b> | 216        | 195   | 0.3003        | 337    | 332   | 0.8467  | <b>75</b>  | 47    | <b>0.0112</b> |
| a4  | 160        | 127   | 0.0514        | <b>227</b> | 171   | <b>0.0050</b> | 254    | 242   | 0.59    | 60         | 42    | 0.0747        |
| a5  | 134        | 117   | 0.2833        | <b>207</b> | 160   | <b>0.0142</b> | 228    | 224   | 0.8508  | 56         | 39    | 0.0811        |
| a6  | 73         | 66    | 0.5527        | <b>130</b> | 100   | <b>0.0479</b> | 134    | 138   | 0.8084  | <b>47</b>  | 27    | <b>0.0201</b> |
| a7  | 54         | 46    | 0.4237        | 70         | 54    | 0.1508        | 90     | 85    | 0.7055  | 16         | 8     | 0.1025        |
| a8  | 51         | 40    | 0.2489        | 80         | 62    | 0.1309        | 72     | 76    | 0.7423  | 19         | 15    | 0.4927        |
| a9  | 50         | 39    | 0.2436        | 46         | 37    | 0.3232        | 56     | 57    | 0.9251  | 12         | 5     | 0.0896        |
| a10 | 89         | 76    | 0.3115        | 164        | 138   | 0.1346        | 145    | 152   | 0.6846  | 32         | 21    | 0.1308        |
| a11 | 47         | 40    | 0.453         | 71         | 54    | 0.1284        | 77     | 75    | 0.8711  | 19         | 16    | 0.6121        |

a12          10          4    0.1088|          16          14    0.715|          12          13    0.8415|          4          2\*    0.4142

Note. \* = chi-squared approximation may be incorrect because of insufficient cell counts. Ma = presence of major depressive disorder; Dy = dysthymia; De = depression not otherwise specified; Po = post traumatic stress disorder; Ob = obsessive compulsive disorder; Ge = generalized anxiety disorder; An = anxiety disorder not otherwise specified; and So = social phobia. a1 = ages 12-13; a2 = ages 14-15; a3 = ages 16-17; a4 = ages 18-19; a5 = ages 20-21; a6 = ages 22-23; a7 = ages 24-25; a8 = ages 26-27; a9 = ages 28-29; a10 = ages 30-39; a11 = ages 40-49; and a12 = ages 50-68.

## Part 2: The R Code for Drawing a Difference 2-D Map and Computing Correlations

```
install.packages('ca')
```

```
library(ca)
```

```
# Create concatenated crosstabulation for matched CA
# Md2 = Md at posttreatment; Md = Md at pretreatment/baseline
# See the note in Table 1 for the symptom full names
# a1 = age 1 at posttreatment; g1 = age 1 at pretreatment
# a1/g1=ages 12-13; a2/g2=ages 14-15; a3/g3=ages 16-17; a4/g4=ages 18-19;
# a5/g5=ages # 20-21; a6/g6=ages 22-23; a7/g7= ages 24-25; a8/g8=ages 26-27;
# a9/g9 ages=28-29; a10/g10 ages=30-39; a11/g11 ages=40-49; a12/g12 ages=50-68
```

```
##read.data
```

```
tmp <- read.table(text="      Ma2      Dy2      De2      Po2      Ob2      Ge2      An2      So2      Ma      Dy
      De      Po      Ob      Ge      An      So      Po2      Ob2      Ge2      An2      So2      Ma      Dy
      g1 19      3      20      3      14      11      10      2      19      1      25      2
9      8      15      2
      g2 252      23      191      51      98      109      232      31      251      24      225
42      74      89      213      14
      g3 437      29      294      125      186      216      337      75      441      25      343
92      143      195      332      47
      g4 419      108      251      110      160      227      254      60      411      101      274
91      127      171      242      42
      g5 377      79      201      117      134      207      228      56      363      71      215
98      117      160      224      39
      g6 233      56      125      72      73      130      134      47      228      54      139
69      66      100      138      27
      g7 141      32      90      65      54      70      90      16      141      33      95
54      46      54      85      8
      g8 157      27      59      60      51      80      72      19      152      23      71
48      40      62      76      15
      g9 108      18      60      52      50      46      56      12      106      21      67
44      39      37      57      5
      g10 308      82      139      139      89      164      145      32      298      66      169
121      76      138      152      21
      g11 152      33      59      76      47      71      77      19      145      29      71
58      40      54      75      16
      g12 36      7      10      5      10      16      12      4      35      3      11      6
4      14      13      2
      a1 19      1      25      2      9      8      15      2      19      3      20      3
14      11      10      2
      a2 251      24      225      42      74      89      213      14      252      23      191
51      98      109      232      31
      a3 441      25      343      92      143      195      332      47      437      29      294
125      186      216      337      75
      a4 411      101      274      91      127      171      242      42      419      108      251
110      160      227      254      60
      a5 363      71      215      98      117      160      224      39      377      79      201
117      134      207      228      56
      a6 228      54      139      69      66      100      138      27      233      56      125
72      73      130      134      47
      a7 141      33      95      54      46      54      85      8      141      32      90
65      54      70      90      16
      a8 152      23      71      48      40      62      76      15      157      27      59
60      51      80      72      19
      a9 106      21      67      44      39      37      57      5      108      18      60
52      50      46      56      12
      a10 298      66      169      121      76      138      152      21      308      82      139
139      89      164      145      32
      a11 145      29      71      58      40      54      75      16      152      33      59
76      47      71      77      19
```

```

10      16      a12 35      3      11      6      4      14      13      2      36      7      10      5
           12      4",
header=TRUE)

```

```

myca <- ca(tmp, 15)
summary(myca)

```

```

## The biplot for two sum-dimensions (1 & 3)

```

```

# We admit that although "rowgreen" (which multiplies the columns standard coordinates by the
# square root of the masses) is a better option statistically, the rowgreen-biplot was
# not legible with our current data set, especially the age groups were too closely bundled.
# The visual inspection of associations between age groups and psychiatric symptom-presence
# indicators was critical in the present study. Therefore, to enhance legibility, we had to
# rely on a "rowgab" biplot (rows in principal coordinates and columns in standard coordinates
# times masses).

```

```

plot(myca, mass=TRUE, map="rowgab", arrows=c(FALSE,TRUE), dim=c(1,3))

```

```

# The sum 2-D map which is quite different from the difference 2-D plot (Figure 1) that was
# included in the main text. The correlational results estimated from the sum 2-D map
# are not correct because the results are not based on optimally scaled differences
# between baseline and posttreatment.
# Note that we edited the sum 2-D map in Adobe because the "rowgab" option includes redundant
# information (e.g., age groups for Pre and Post and the psychiatric symptoms for Pre and Post),
# so in the sum 2-D map we removed the redundant information. We did the same thing for Figure 1
# included in the main text (Letter).

```

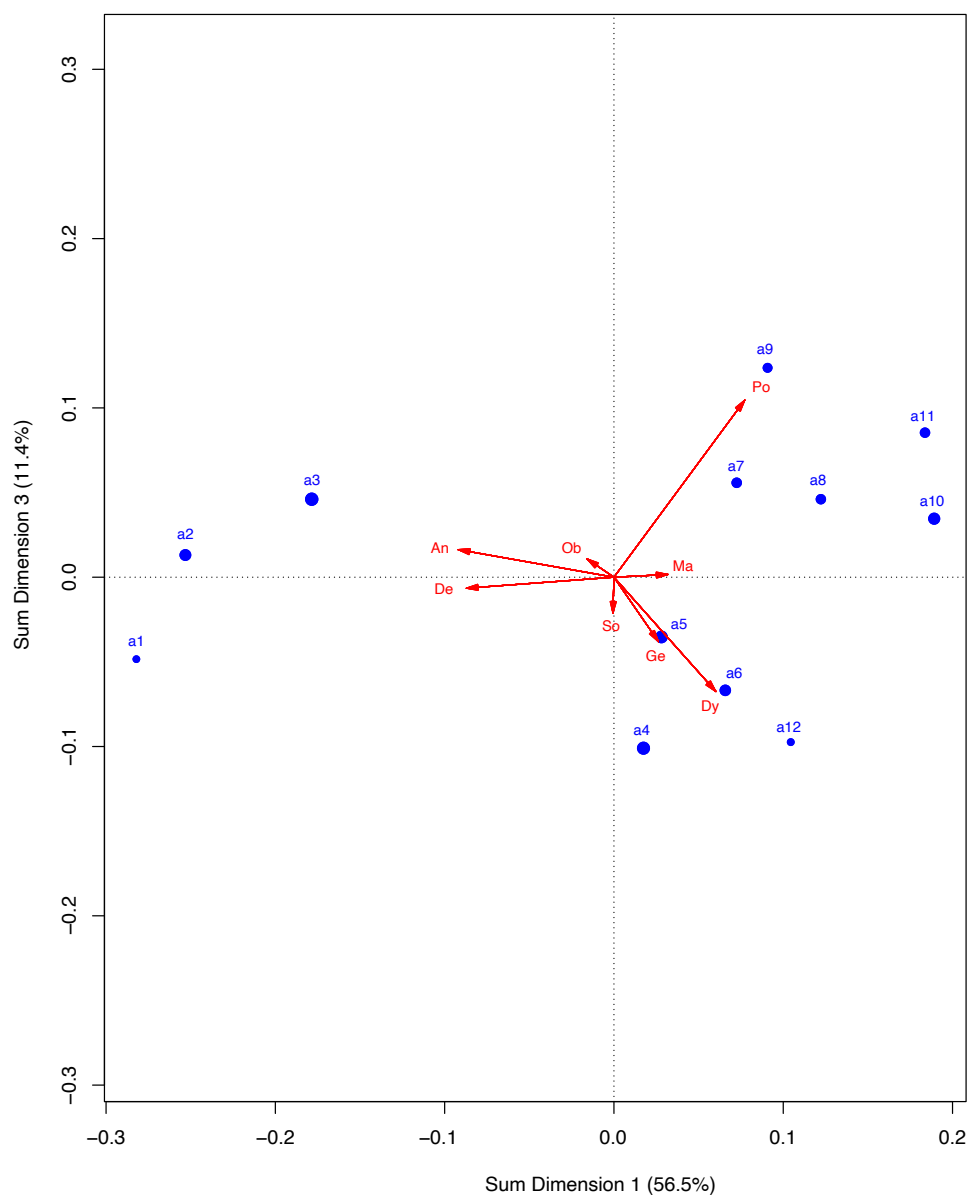

Figure 2. The 2-D Plot Constructed with Sum Dimensions 1 and 3.

Ma = presence of major depressive disorder; Dy = dysthymia; De = depression not otherwise specified; Po = post traumatic stress disorder; Ob = obsessive compulsive disorder; Ge = generalized anxiety disorder; An = anxiety disorder not otherwise specified; and So = social phobia. a1 = ages 12-13; a2 = ages 14-15; a3 = ages 16-17; a4 = ages 18-19; a5 = ages 20-21; a6 = ages 22-23; a7 = ages 24-25; a8 = ages 26-27; a9 = ages 28-29; a10 = ages 30-39; a11 = ages 40-49; and a12 = ages 50-68.

**## The biplot for two difference-dimensions (2 & 7) was included in the letter**

**# Use a visualization "rowgab" option on page 266 in Greenacre, M. J. (2017). Correspondence Analysis in Practice. 3<sup>rd</sup> ed. Boca Raton, FL: Chapman & Hall/CRC.**

```
plot(ca(tmp), mass=TRUE, map="rowgab", arrows=c(FALSE,TRUE), dim=c(2,7))
```

**### Estimate Category Correlations**

**## choose (1, 3) for sum-dimensional correlations**

**## choose (2, 7) for difference-dimensional correlations, which was our main interest**

```
#plane <- c(1, 3) # for a sum 2-D map
```

```

plane <- c(2, 7) # for a difference 2-D map

#####

myca$rowcoord <- myca$rowcoord %*% diag(myca$sv)
row.scores=myca$rowcoord

#compute row scores for the data
#note that we can use row scores or row weights tmp.svd$u
row.corr=matrix(nrow=nrow(tmp),ncol=nrow(tmp))

#create a matrix to hold the row correlations
rownames(row.corr)=rownames(tmp) #add the labels for columns
colnames(row.corr)=rownames(tmp) #add the labels for columns

#### ROW category correlations ####

#rads to degs 57.2957795 degrees
#remember atan2 is (y, x)
convert=57.29577958
for(i in 1:nrow(row.corr)){ #for each row in the data
  row1=atan2(row.scores[i,plane[1]],
             row.scores[i,plane[2]])*convert
  #get the arctan on plane
  for(j in 1:ncol(row.corr)){ #for row j
    row2=atan2(row.scores[j,plane[1]],
               row.scores[j,plane[2]])*convert
    #get the arctan on designated plane
    row.corr[i,j]=cos((row1-row2)/convert)
    #subtract the two dimensions to get the angle between them,
    #convert it into degrees from radians, get the cosine of the angle
    #(which is the correlation between row i and j)
  }
}
round(row.corr,2)

#### COLUMN category correlations ####

column.scores=myca$colcoord

#to get correlations between columns:
column.corr=matrix(nrow=ncol(tmp),
                   ncol=ncol(tmp)) #create a matrix to hold the row correlations
rownames(column.corr)=colnames(tmp) #add the labels for columns
colnames(column.corr)=colnames(tmp) #add the labels for columns

for(i in 1:nrow(column.corr)){ #for each var in the data
  column1=atan2(column.scores[i,plane[1]],
                column.scores[i,plane[2]])*convert
  #get the arctan on designated plane
  for(j in 1:ncol(column.corr)){ #for var j
    column2=atan2(column.scores[j,plane[1]],
                  column.scores[j,plane[2]])*convert
    #get the arctan on plane
    column.corr[i,j]=cos((column1-column2)/convert)
    #subtract the plane to get the angle between them,
    #convert it into degrees from radians, get the cosine of the angle
    #(which is the correlation between row i and j)
  }
}
round(column.corr,2)

#### ROW & COLUMN category correlations ####
#### Using Greenacre p 98 to calculate cos(theta)

row.col.corr.rsc=matrix(nrow=nrow(tmp),
                        ncol=ncol(tmp))
colnames(row.col.corr.rsc)=colnames(tmp) #add the labels for columns
rownames(row.col.corr.rsc)=rownames(tmp) #add the labels for columns

for(i in 1:nrow(tmp)){ #for each var in the data

  # length of row vector in plane

```

```

row=sqrt(myca$rowcoord[i,plane[1]]^2+myca$rowcoord[i,plane[2]]^2)

for(j in 1:ncol(tmp)){ #for var j

  #length of column vector in plane
  column=sqrt(myca$colcoord[j,plane[1]]^2+myca$colcoord[j,plane[2]]^2)

  # cross product of row and column vectors in plane
  rtc=t(myca$rowcoord[i,c(plane[1],plane[2])])%*%myca$colcoord[j,c(plane[1],plane[2])])

  #costheta is cross product divided by the product of the lengths of row and colum vectors
  costheta=rtc/(row*column)

  # Save the value in the cor matrix
  row.col.corrs.rsc[i,j]=costheta

}
}
round(row.col.corrs.rsc,2)

```

### Part 3: How to Identify Sum and Difference Dimensions?

In a concatenated matrix, the rows and columns are repeated twice, and matched CA estimates two sets of identical row and column coordinates up to possible sign changes. In the case of a 24 × 16 table, if the first 12 coordinate values in the rows are identical to the last 12 coordinate values in a given dimension, the dimension corresponds to the sum A (aftertreatment) + B (baseline) (equivalently between-age of treatment) (see Dim1 and Dim3 in Table 1). On the other hand, if the first 12 row coordinate values are opposite to the last 12 values in a given dimension, the dimension corresponds to the difference, A – B (equivalently within-age of treatment differences) (see Dim2 and Dim7 in Table 2).

**TABLE 2**

*Standard Coordinates from Matched CA of a 24 x 16 Concatenated Matrix*

| Symptom | Dim1      | Dim3      | . | Dim11     | Dim2       | Dim7       | . | Dim15      |
|---------|-----------|-----------|---|-----------|------------|------------|---|------------|
| Ma      | 0.232143  | 0.011702  | . | -0.770616 | -0.120065  | 0.336590   | . | -1.844440  |
| Dy      | 2.417132  | -2.712085 | . | 0.252162  | -0.644508  | 2.806287   | . | 0.674514   |
| .       | .         | .         | . | .         | .          | .          | . | .          |
| .       | .         | .         | . | .         | .          | .          | . | .          |
| So      | -0.037066 | -1.319237 | . | -2.015169 | -2.918518  | -2.987181  | . | -0.139790  |
| Ma      | 0.232143  | 0.011702  | . | -0.770616 | 0.120065   | -0.336590  | . | 1.844440   |
| Dy      | 2.417132  | -2.712085 | . | 0.252162  | 0.644508   | -2.806287  | . | -0.674514  |
| .       | .         | .         | . | .         | .          | .          | . | .          |
| .       | .         | .         | . | .         | .          | .          | . | .          |
| So      | -0.037066 | -1.319237 | . | -2.015169 | 2.918518   | 2.987181   | . | 0.139790   |
|         | Sum       | Sum       | . | Sum       | Difference | Difference | . | Difference |
|         | 56.5%     | 11.4%     | . | 0.4%      | 15.7%      | 1%         | . | 0%         |
| Total   |           |           |   | 81%       |            |            |   | 19%        |

*Note.* The coordinates of the first two differences were boxed. Ma = presence of major depressive disorder; Dy = dysthymia; De = depression not otherwise specified; Po = post traumatic stress disorder; Ob = obsessive compulsive disorder; Ge = generalized anxiety disorder; An = anxiety disorder not otherwise specified; and So = social phobia.

Although matched CA allows us to estimate sum and difference dimensions separately, our main interest in the study is to examine the difference dimensions; specifically, we want to study positions of psychiatric symptom points projected onto a 2-D map where the horizontal axis is made with the first difference dimension and the vertical axis with the second difference dimension.

**Interpreting symptom points in a difference 2-D map.** A 2-D map includes configurations of the After – Before differences in both age groups and symptoms. The differences signify the reminiscent comorbidity appearing in the age groups and the psychiatric symptoms. These differences are displayed as age group points and symptom points in the 2-D map (see Figure 1 in the letter). The age group points indicate the degree of improvement or deterioration aggregated over all psychiatric symptom effects or comorbidity, whereas the symptom points represent the degree of improvement or deterioration aggregated over all age groups. In either way, if the points are close to the origin of (0, 0), this implies no change in comorbidity after treatment; if the points are at the left (negative) side of the origin, this implies improvement in comorbidity after treatment; and if the points are at the right (positive) side of the origin, this implies deterioration in comorbidity after treatment.

#### **Part 4: Interpretation of Correlations**

Using the R code included here, we estimated correlations between row categories; between column categories; and between row and column categories. However, since we were interested in the correlations between row and column categories (the 3<sup>rd</sup> Part in the R code), we included only row-column category correlations in Table 2. In the table, we boxed only the correlations (equal to or larger than 0.6) cross-tabulated between age groups whose contributions were above the average ( $8.3\% = 100\%/12$ ) and the psychiatric symptoms whose contributions were above the average ( $12.5\% = 100\%/8$ ). The contributions of age groups and symptom indicators were calculated with the information provided in the “ctr” column in the results from the R code, “summary(myca)” included in Part 1.

According to the boxed correlations, ages 14-15 (12%), ages 16-17 (18%), ages 18-19 (15%), ages 20-21 (11%), ages 22-23 (9%), and ages 30-39 (10%) were highly related with obsessive compulsive disorder (18%), generalized anxiety disorder (25%), and social phobia (27%), implying that these age groups would be more vulnerable to these three symptoms than any other psychiatric symptoms.

TABLE 3

*The Symptom Contributions (%) in a Difference 2-D Map and Correlations between Age Groups and Psychiatric Symptoms in the Map.*

| Cont. %                 | Ma (1%) | Dy (4%) | De (12%) | Po (12%) | Ob (18%)    | Ge (25%)    | An (1%) | So (27%)    |
|-------------------------|---------|---------|----------|----------|-------------|-------------|---------|-------------|
| Ages 12-13 (2%)         | 0.81    | 0.74    | -0.75    | 1        | 0.75        | 1           | -0.48   | 0.17        |
| <b>Ages 14-15 (12%)</b> | 0       | -0.11   | -0.97    | 0.65     | <b>0.97</b> | <b>0.63</b> | 0.43    | <b>0.9</b>  |
| <b>Ages 16-17 (18%)</b> | 0.16    | 0.04    | -1       | 0.76     | <b>1</b>    | <b>0.75</b> | 0.28    | <b>0.82</b> |
| <b>Ages 18-19 (15%)</b> | 0.38    | 0.27    | -0.99    | 0.89     | <b>0.99</b> | <b>0.88</b> | 0.05    | <b>0.66</b> |
| <b>Ages 20-21 (11%)</b> | 0.45    | 0.34    | -0.97    | 0.92     | <b>0.97</b> | <b>0.91</b> | -0.02   | <b>0.61</b> |
| <b>Ages 22-23 (9%)</b>  | 0.16    | 0.05    | -1       | 0.76     | <b>1</b>    | <b>0.75</b> | 0.28    | <b>0.82</b> |
| Ages 24-25 (5%)         | 0.19    | 0.07    | -1       | 0.78     | 1           | 0.77        | 0.25    | 0.8         |
| Ages 26-27 (6%)         | 0.6     | 0.51    | -0.91    | 0.98     | 0.91        | 0.97        | -0.21   | 0.45        |
| Ages 28-29 (5%)         | 0.08    | -0.03   | -0.99    | 0.71     | 0.99        | 0.69        | 0.35    | 0.86        |
| <b>Ages 30-39 (10%)</b> | 0.63    | 0.54    | -0.9     | 0.98     | <b>0.9</b>  | <b>0.98</b> | -0.24   | 0.42        |
| Ages 40-49 (6%)         | 0.63    | 0.53    | -0.9     | 0.98     | 0.9         | 0.98        | -0.24   | 0.42        |
| Ages 50-68 (2%)         | 0.61    | 0.52    | -0.91    | 0.98     | 0.91        | 0.97        | -0.22   | 0.44        |

*Note.* We bolded Age Groups and Symptoms whose contributions were equal to or larger than the average contribution in the difference 2-D map and boxed around correlations between those age groups and symptoms (but we included the correlation larger than +0.6 for further investigation). Ma = presence of major depressive disorder; Dy = dysthymia; De = depression not otherwise specified; Po = post traumatic stress disorder; Ob = obsessive compulsive disorder; Ge = generalized anxiety disorder; An = anxiety disorder not otherwise specified; and So = social phobia.
